# Supplementary material for: Highly efficient visible-light-driven catalytic hydrogen evolution from ammonia borane using non-precious metal nanoparticles supported by graphitic carbon nitride
Source: Royal Society of Chemistry journal article supplement (doi:10.1039/c6ta08987a), 2016-12-30
Supplement: c6ta08987a1.pdf [file c6ta08987a1.pdf]

**Highly efficient visible-light-driven catalytic hydrogen evolution from ammonia borane using non-precious metal nanoparticles supported by graphitic carbon nitride**

Hao Zhang, Xiaojun Gu\*, Penglong Liu, Jin Song, Jia Cheng and Haiquan Su\*

Inner Mongolia Key Laboratory of Coal Chemistry, School of Chemistry and Chemical Engineering, Inner Mongolia University, Hohhot 010021, China

\*E-mail: xiaojun.gu@yahoo.com, haiquansu@yahoo.com

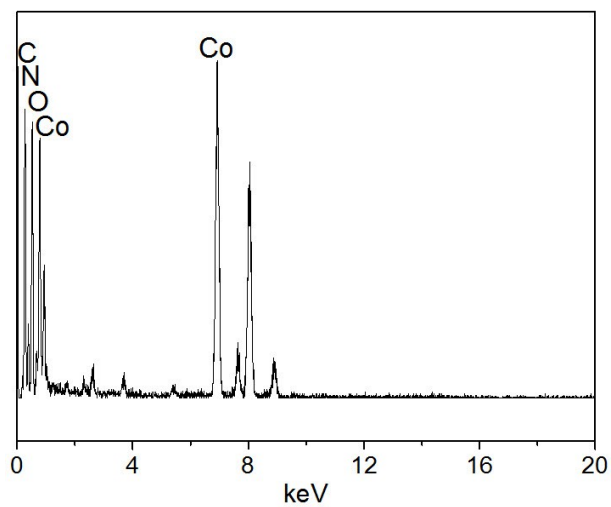

**Fig. S1** EDS pattern of Co/C<sub>3</sub>N<sub>4</sub>-1.

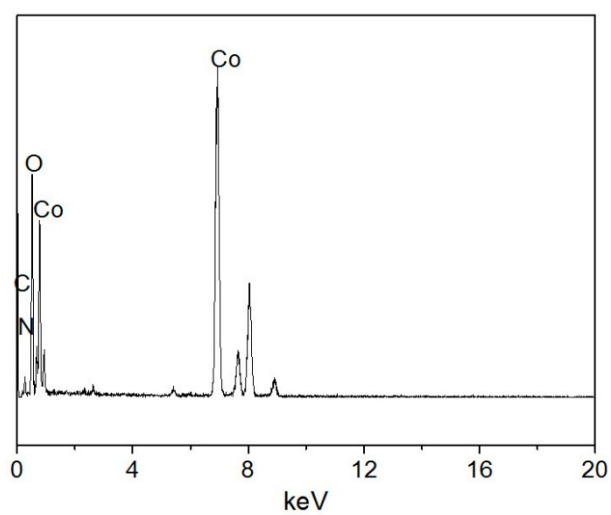

**Fig. S2** EDS pattern of Co/C<sub>3</sub>N<sub>4</sub>-2.

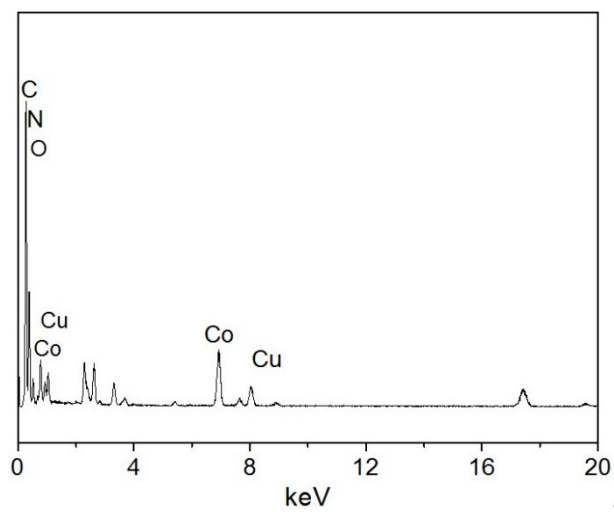

**Fig. S3** EDS pattern of (c) CuCo/C<sub>3</sub>N<sub>4</sub>-1.

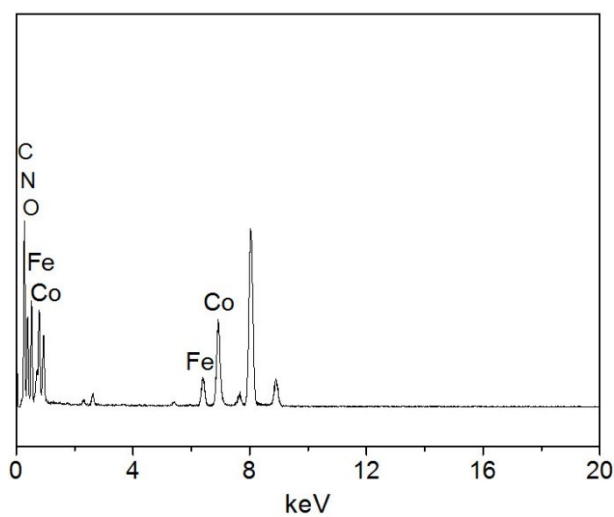

**Fig. S4** EDS pattern of FeCo/C<sub>3</sub>N<sub>4</sub>-1.

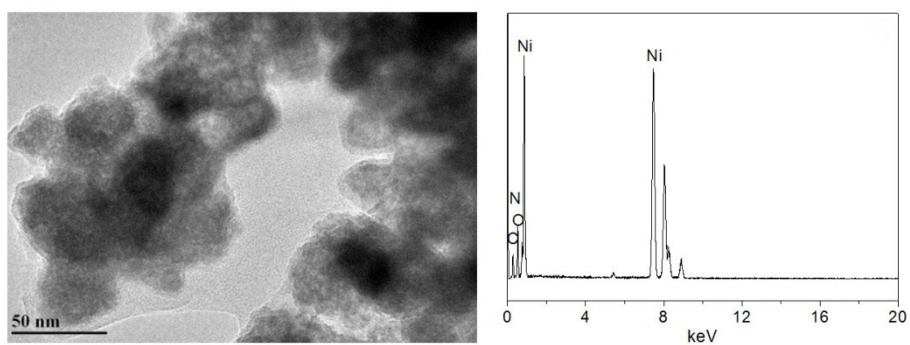

**Fig. S5** TEM image and EDS pattern of Ni/g-C<sub>3</sub>N<sub>4</sub>-1.

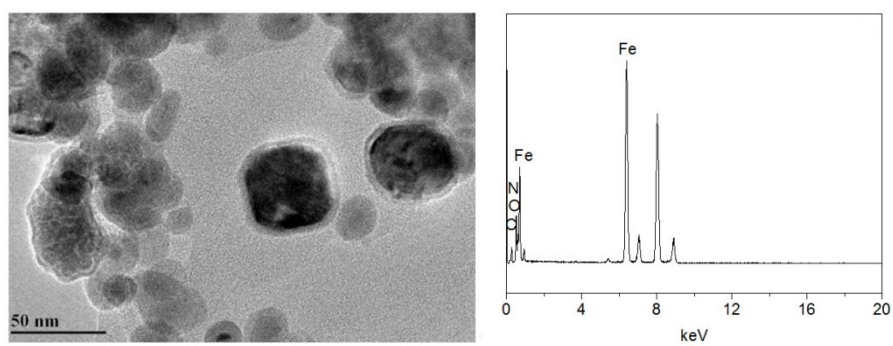

**Fig. S6** TEM image and EDS pattern of Fe/g-C<sub>3</sub>N<sub>4</sub>-1.

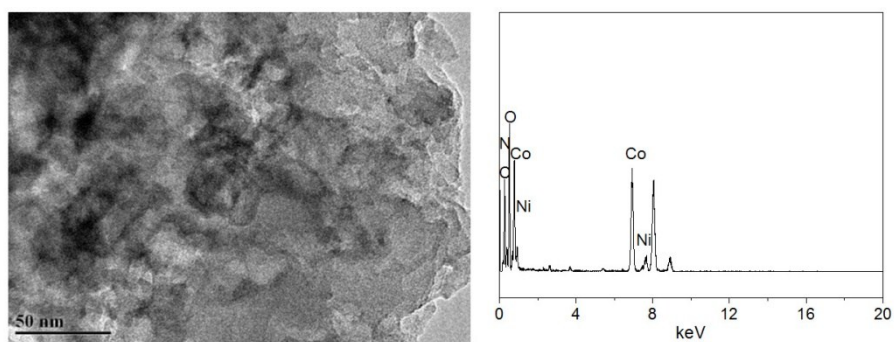

**Fig. S7** TEM image and EDS pattern of NiCo/g-C<sub>3</sub>N<sub>4</sub>-1.

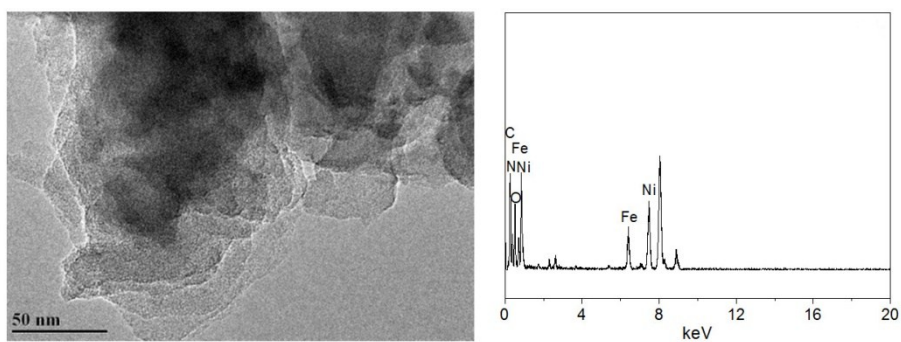

**Fig. S8** TEM image and EDS pattern of FeNi/g-C<sub>3</sub>N<sub>4</sub>-1.

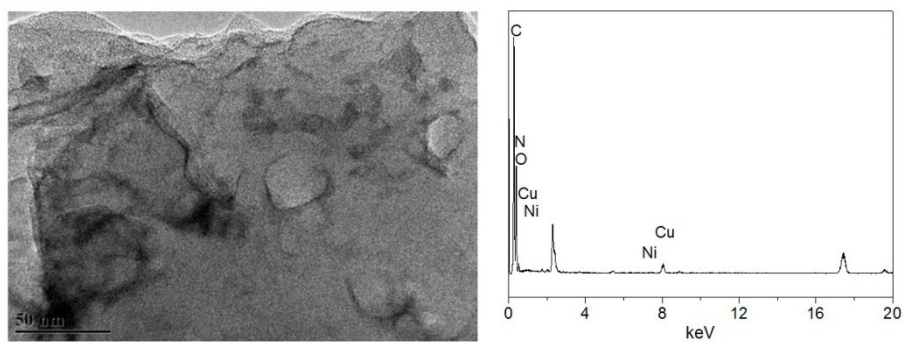

**Fig. S9** TEM image and EDS pattern of CuNi/g-C<sub>3</sub>N<sub>4</sub>-1.

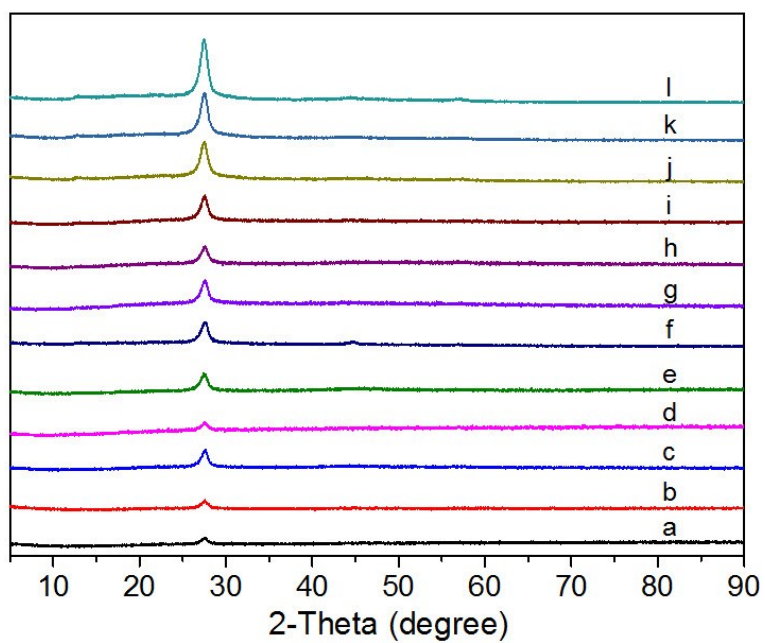

**Fig. S10** PXRD patterns of (a) Co/g-C<sub>3</sub>N<sub>4</sub>-1, (b) Ni/g-C<sub>3</sub>N<sub>4</sub>-1, (c) Fe/g-C<sub>3</sub>N<sub>4</sub>-1, (d) Co/g-C<sub>3</sub>N<sub>4</sub>-2, (e) Ni/g-C<sub>3</sub>N<sub>4</sub>-2, (f) Fe/g-C<sub>3</sub>N<sub>4</sub>-2, (g) CuCo/g-C<sub>3</sub>N<sub>4</sub>-1, (h) NiCo/g-C<sub>3</sub>N<sub>4</sub>-1, (i) FeCo/g-C<sub>3</sub>N<sub>4</sub>-1, (j) CuNi/g-C<sub>3</sub>N<sub>4</sub>-1, (k) FeNi/g-C<sub>3</sub>N<sub>4</sub>-1 and (l) g-C<sub>3</sub>N<sub>4</sub>.

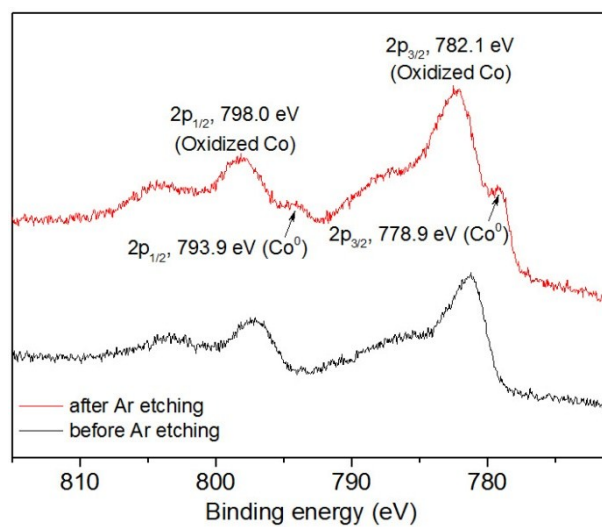

**Fig. S11** XPS patterns for Co/g-C<sub>3</sub>N<sub>4</sub>-1 before and after Ar etching.

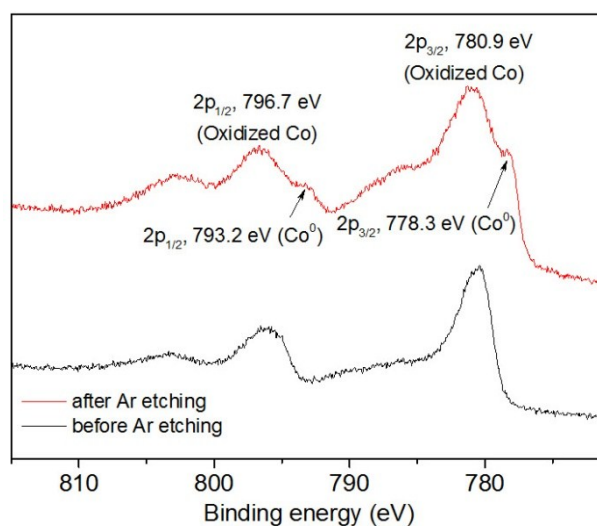

**Fig. S12** XPS patterns for Co/g-C<sub>3</sub>N<sub>4</sub>-2 before and after Ar etching.

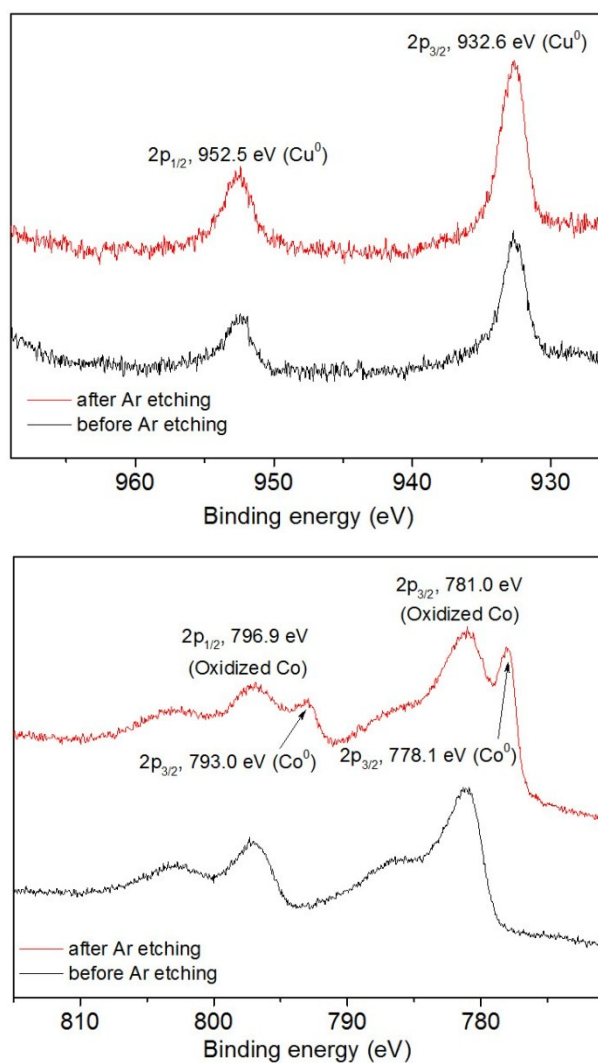

**Fig. S13** XPS patterns for CuCo/g-C<sub>3</sub>N<sub>4</sub>-1 before and after Ar etching.



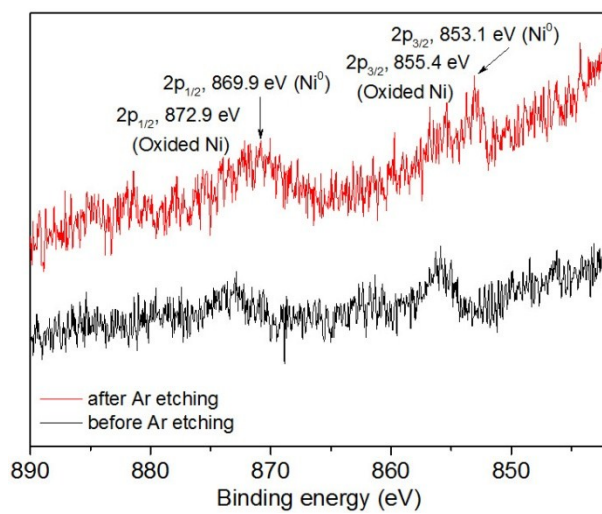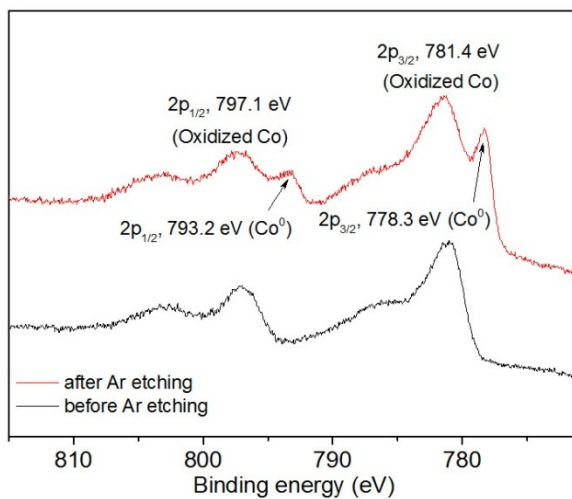

**Fig. S14** XPS patterns for NiCo/g-C<sub>3</sub>N<sub>4</sub>-1-Co before and after Ar etching.

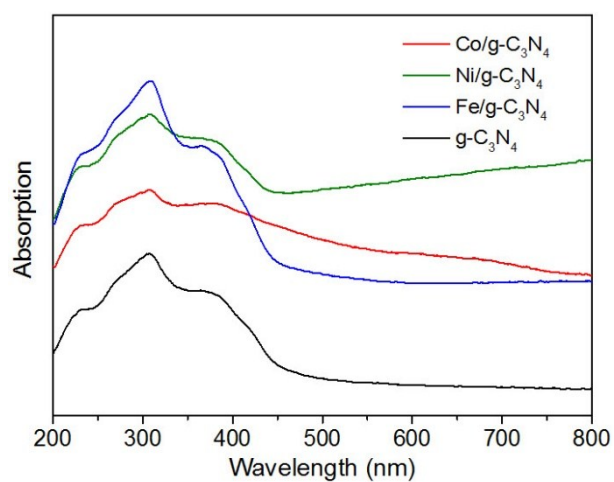

**Fig. S15** UV-Vis adsorption spectra of  $\text{g-C}_3\text{N}_4$  and the ex situ-synthesized catalysts.

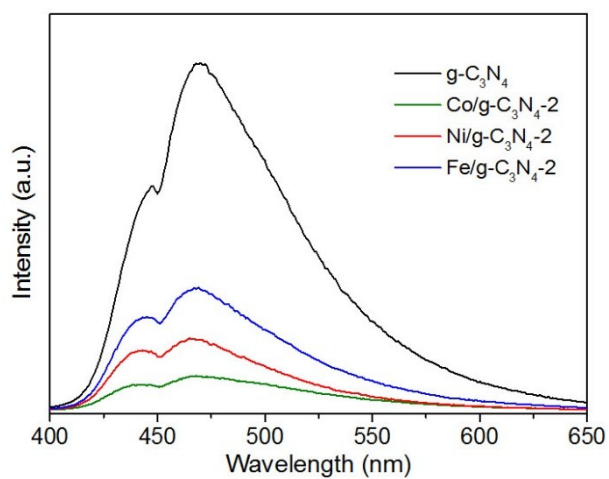

**Fig. S16** Photoluminescence spectra of  $\text{g-C}_3\text{N}_4$  and the ex situ-synthesized catalysts.

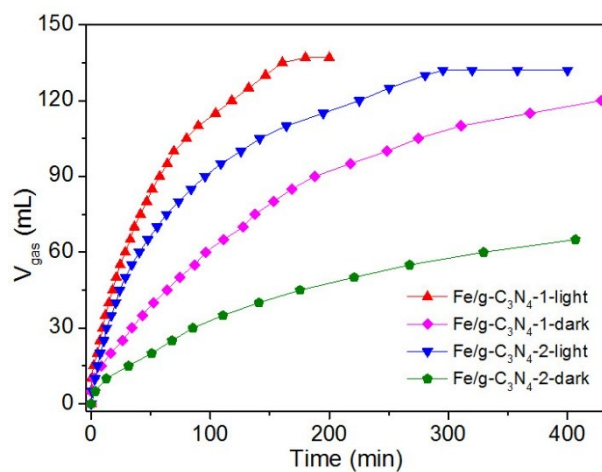

**Fig. S17** Plots of time versus volume of generated H<sub>2</sub> from NH<sub>3</sub>BH<sub>3</sub> aqueous solution over Fe/g-C<sub>3</sub>N<sub>4</sub>-1 and Fe/g-C<sub>3</sub>N<sub>4</sub>-2 under visible light irradiation and in the dark at 298 K.

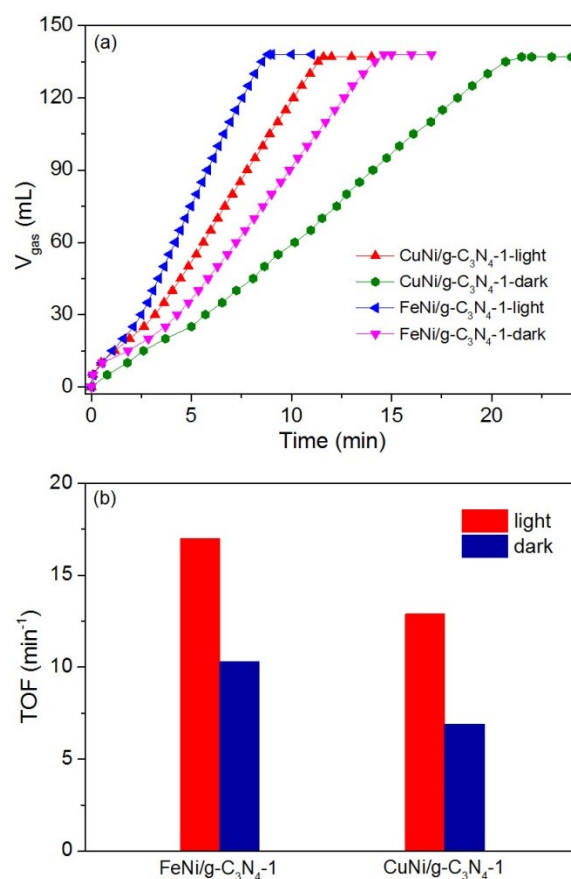

**Fig. S18** (a) Plots of time versus volume of generated H<sub>2</sub> from NH<sub>3</sub>BH<sub>3</sub> aqueous solution over different bimetallic catalysts under visible light irradiation and in the dark at 298 K and (b) the corresponding total TOF values of the above two catalysts under two different conditions.

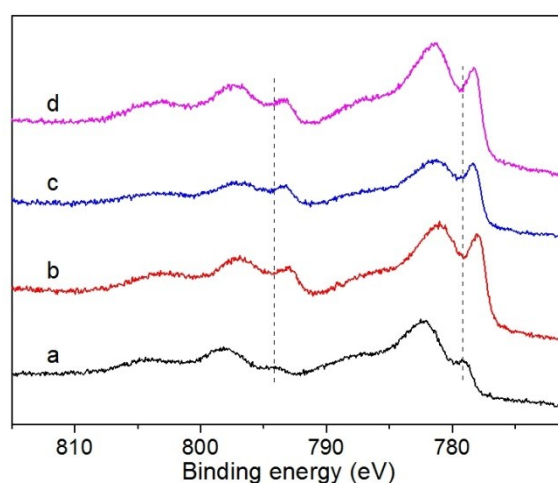

**Fig. S19** XPS patterns for (a) Co/g-C<sub>3</sub>N<sub>4</sub>-1, (b) CuCo/g-C<sub>3</sub>N<sub>4</sub>-1-Co, (c) FeCo/g-C<sub>3</sub>N<sub>4</sub>-1-Co and (d) NiCo/g-C<sub>3</sub>N<sub>4</sub>-1-Co after Ar etching.
